# Supplementary material
Source: HighWire-hosted journal article supplement (https://erj.ersjournals.com/content/56/2/2002223)
Supplement: inline-supplementary-material-1 [file inline-supplementary-material-1.pdf]

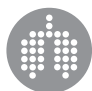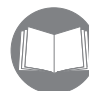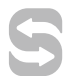

SHAREABLE PDF

# The contribution of *Aspergillus fumigatus* to COPD exacerbations: a “sensitive” topic

David Connell<sup>1,2</sup> and Anand Shah <sup>3,4</sup>

**Affiliations:** <sup>1</sup>Dept of Respiratory Medicine, NHS Tayside, Dundee, UK. <sup>2</sup>Division of Molecular and Clinical Medicine, University of Dundee, Dundee, UK. <sup>3</sup>Dept of Respiratory Medicine, Royal Brompton and Harefield NHS Foundation Trust, London, UK. <sup>4</sup>Dept of Infectious Diseases Epidemiology, School of Public Health, Imperial College London, London, UK.

**Correspondence:** Anand Shah, Consultant Respiratory Medicine, Royal Brompton and Harefield NHS Foundation Trust, Sydney Street, London, SW3 6NP, UK. E-mail: A.Shah2@rbht.nhs.uk

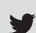

@ERSpublications

**Fungal sensitisation appears to play an important role in COPD disease progression** <https://bit.ly/30NcEcL>

**Cite this article as:** Connell D, Shah A. The contribution of *Aspergillus fumigatus* to COPD exacerbations: a “sensitive” topic. *Eur Respir J* 2020; 56: 2002223 [<https://doi.org/10.1183/13993003.02223-2020>].

This single-page version can be shared freely online.

*Aspergillus fumigatus* is a ubiquitous mould that can cause a spectrum of clinical disease ranging from invasive aspergillosis to allergic sensitisation depending on the host immune response [1]. The role of fungi and, in particular, *A. fumigatus* in driving COPD progression has been debated for many years. Susceptibility to invasive aspergillosis in COPD patients has been long reported and is now established as a significant risk factor [2]. The importance of fungi in COPD pathophysiology has curiously been raised for many years in the development of equine COPD which has been shown to be related to hypersensitivity to fungi (including *A. fumigatus*) in poor quality hay and straw bedding [3].
